# Supplementary material for: Age-shifting in malaria incidence as a result of induced immunological deficit: a simulation study
Source: Springer Nature journal article supplement (doi:10.1186/s12936-015-0805-1), 2015-07-24

# Supplementary figures to Age-shifting in malaria incidence as a result of induced immunological deficit : a simulation study

July 8, 2015

## Seasonal malaria chemoprophylaxis health outcomes, reported by model

The following figures demonstrate that the six *OpenMalaria* model variants used in this study make very similar predictions for disease outcomes. All six models display similar behaviour in their predictions of the temporal variations in events averted, Figures 1–3, and in their predictions of the affected age groups, Figures 4–6. As these are the primary inputs to our downstream analyses, e.g. the calculation of DALYs averted, these predictions will also be similarly uniform across the six models used.

Detailed lists of the parameters used in each model can be found in [1].

### Author details

### References

1. Smith T, Ross A, Maire N, Chitnis N, Studer A, Hardy D, et al. Ensemble modeling of the likely public health impact of a pre-erythrocytic malaria vaccine. *PLoS Med*. 2012 Jan;9(1):e1001157.

Table 1: **Simulation parameters**

| Model | Description                                                           |
|-------|-----------------------------------------------------------------------|
| R0000 | Base model                                                            |
| R0068 | Heterogeneity in transmission: within-host variability                |
| R0131 | Immunity decay in effective cumulative exposure                       |
| R0132 | Immunity decay in immune proxies                                      |
| R0133 | Immunity decay in both immune proxies & effective cumulative exposure |
| R0670 | Heterogeneity in susceptibility to co-morbidity                       |

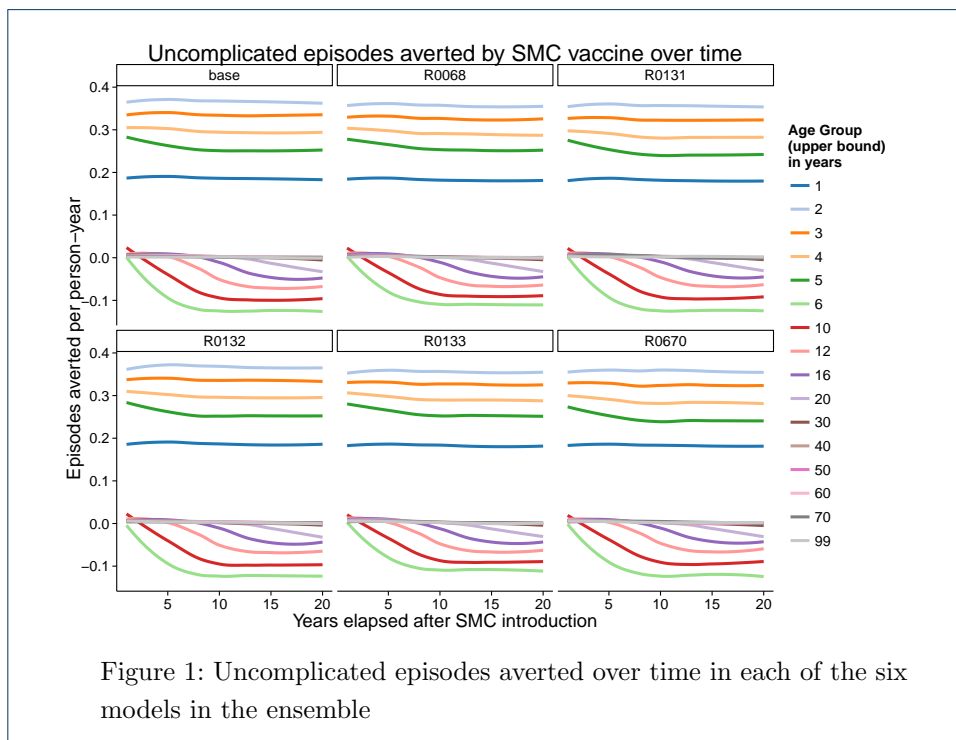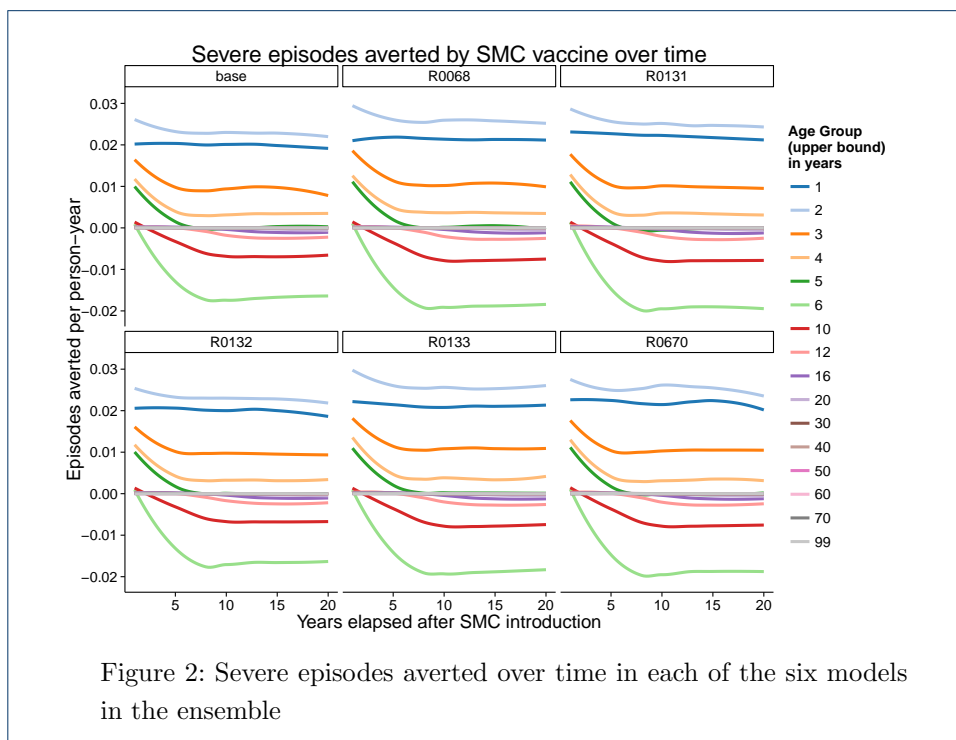

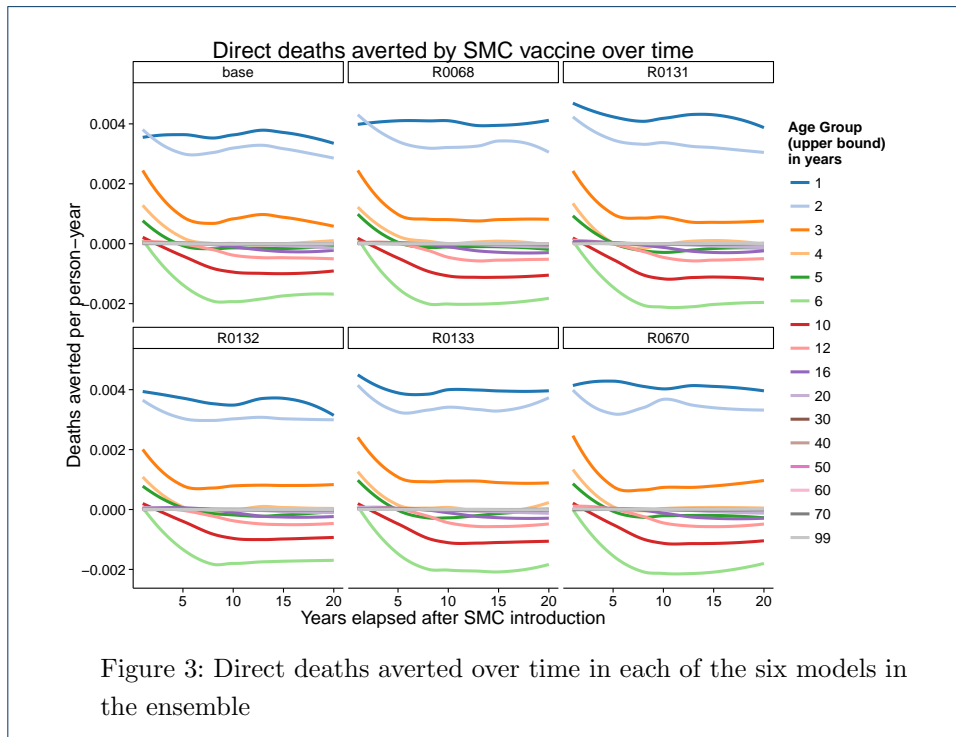

Figure 3: Direct deaths averted over time in each of the six models in the ensemble

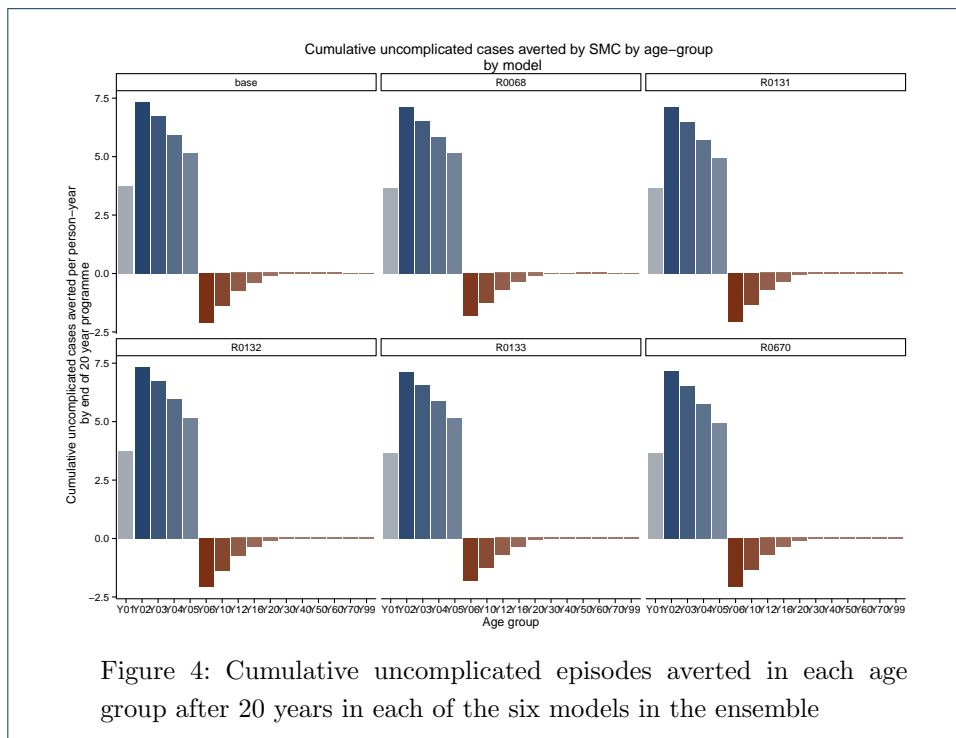

Figure 4: Cumulative uncomplicated episodes averted in each age group after 20 years in each of the six models in the ensemble

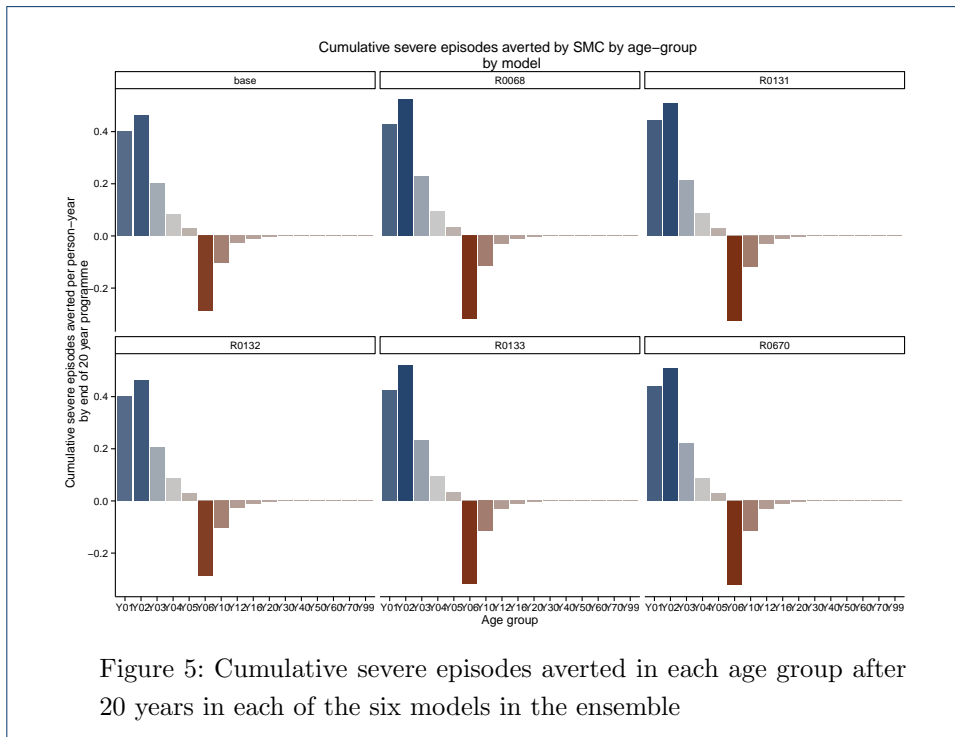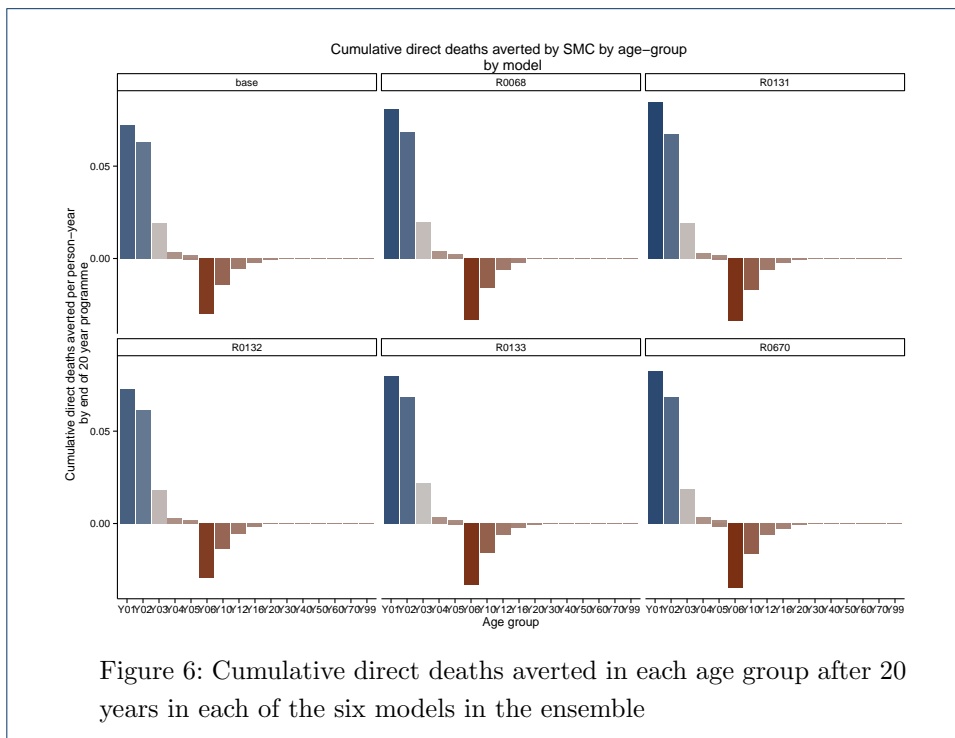

Supplement: MOESM1 [file 9761482]
